# Supplementary material for: A genetic variant near olfactory receptor genes influences cilantro preference
Source: Springer Nature journal article supplement (doi:10.1186/2044-7248-1-22), 2012-11-29
Supplement: 13411_2012_38_MOESM3_ESM.pdf [file 13411_2012_38_MOESM3_ESM.pdf]

**Table S1: Index SNPs with  $p < 10^{-6}$  for cilantro preference in the replication set**

| SNP           | chrom  | pos         | genes                  | MAF   | $r^2$ | allele | $p$ -value           |
|---------------|--------|-------------|------------------------|-------|-------|--------|----------------------|
| rs6743485     | 2q32.3 | 196,502,386 | <i>SLC39A10</i>        | 0.180 | 0.963 | A/G    | $2.78 \cdot 10^{-7}$ |
| rs4583705     | 4p16.3 | 973,036     | <i>DGKQ/IDUA</i>       | 0.120 | 0.823 | C/T    | $4.74 \cdot 10^{-7}$ |
| chr7:31426727 | 7p14.3 | 31,426,727  | <i>NEUROD6/CCDC129</i> | 0.068 | 0.550 | A/G    | $6.98 \cdot 10^{-7}$ |
| rs4406896     | 12q12  | 41,188,338  | <i>CNTN1</i>           | 0.277 | 0.978 | C/T    | $8.64 \cdot 10^{-7}$ |

Columns are as in Table 2 and Additional file 2.
